# Supplementary material for: Quantitative imaging of transcription in living Drosophila embryos reveals the impact of core promoter motifs on promoter state dynamics
Source: PubMed Central journal article supplement (PMC8302612; doi:10.1038/s41467-021-24461-6), 2021-07-23
Supplement: 41467_2021_24461_MOESM3_ESM.pdf [file 41467_2021_24461_MOESM3_ESM.pdf]

## Description of Additional Supplementary Files

File Name: Supplementary Movie 1

Description: Representative false-colour imaging of *snaE<sna<24xMS2-yellow* in *nc14*. Nuclei colour corresponds to GFP fluorescence intensity as in Figure 3C with inactive nuclei

File Name: Supplementary Movie 2

Description: Representative false colour imaging of *snaE<snaTATAlight<24xMS2- yellow* in *nc14*. Nuclei colour corresponds to GFP fluorescence intensity as in Figure 3C with inactive nuclei in grey and highly active nuclei in yellow. Intensity scale is common to Supplementary Movies 1-3.

File Name: Supplementary Movie 3

Description: Representative false colour imaging of *snaE<snaTAMut<24xMS2- yellow* in *nc14*. Nuclei colour corresponds to GFP fluorescence intensity as in Figure 3C with inactive nuclei in grey and highly active nuclei in yellow. Intensity scale is common to Supplementary Movies 1-3.

File Name: Supplementary Movie 4

Description: Live imaging of *snaE<sna+INR<24xMS2-yellow* representative of *NC14* beginning at mitosis. Nuclei are detected using His2Av-mRFP and MS2 using MCP-GFP.

File Name: Supplementary Movie 5

Description: Live imaging of *snaE<kr<24xMS2-yellow* representative of *NC14* beginning at mitosis. Nuclei are detected using His2Av-mRFP and MS2 using MCP-GFP.

File Name: Supplementary Movie 6

Description: Live imaging of *snaE<kr-INR1<24xMS2-yellow* representative of *NC14* beginning at mitosis. Nuclei are detected using His2Av-mRFP and MS2 using MCP-GFP.

File Name: Supplementary Movie 7

Description: Live imaging of *snaE<kr<24xMS2-yellow* in a *nanos:GAL4> UAS:MCP- GFP-His2Av-RFP*, *UAS:white RNAi* background, representative of *nc14* beginning at mitosis. Nuclei are detected using His2Av-mRFP and MS2 using MCP-GFP.

File Name: Supplementary Movie 8

Description: Live imaging of *snaE<kr<24xMS2-yellow* in a *nanos:GAL4> UAS:MCP- GFP-His2Av-RFP*, *UAS:Nelf-A RNAi* background, representative of *nc14* beginning at mitosis. Nuclei are detected using His2Av-mRFP and MS2 using MCP-GFP.
